# Supplementary material for: In Vitro Synergism of Penicillin and Ceftriaxone against Enterococcus faecalis
Source: MDPI journal article supplement (doi:10.3390/microorganisms9102150), 2021-10-14
Supplement: s1 [file s1]

## Supplementary material microorganisms-1371730

**Table S1:** Antibiotic susceptibility results determined by Vitek 2 (bioMerieux, France). Susceptibility breakpoints are based on EUCAST breakpoints. S = susceptible, R = resistant, I = intermediate. N.A. = not available.

| Isolate | vancomycin | teicoplanin | linezolid | quinupristin/<br>dalfopristin | moxifloxacin | levofloxacin | trimethoprim/<br>sulfamethoxazol | gentamicin/high<br>level | tigecyclin |
|---------|------------|-------------|-----------|-------------------------------|--------------|--------------|----------------------------------|--------------------------|------------|
| 5187    | S          | S           | S         | R                             | S            | S            | R                                | R                        | S          |
| 245     | S          | S           | S         | R                             | S            | R            | N.A.                             | S                        | S          |
| ATCC    | N.A.       | N.A.        | N.A.      | N.A.                          | N.A.         | N.A.         | N.A.                             | N.A.                     | N.A.       |
| 6747    | S          | S           | S         | R                             | S            | S            | R                                | S                        | S          |
| 8669    | S          | S           | S         | R                             | S            | S            | R                                | S                        | S          |
| 9367    | S          | S           | S         | N.A.                          | S            | I            | R                                | S                        | S          |
| 1653    | S          | S           | S         | N.A.                          | N.A.         | S            | S                                | N.A.                     | S          |
| 848     | S          | S           | S         | R                             | S            | I            | R                                | S                        | S          |
| 5597    | S          | S           | S         | R                             | S            | S            | R                                | S                        | S          |
| 6886    | S          | S           | S         | R                             | S            | S            | R                                | S                        | S          |
| 281     | S          | S           | S         | R                             | S            | S            | R                                | S                        | S          |
| 67230   | S          | S           | S         | R                             | S            | I            | R                                | S                        | S          |
| 2164    | S          | S           | S         | R                             | S            | I            | R                                | S                        | S          |
| 4497    | S          | S           | S         | N.A.                          | S            | I            | R                                | R                        | S          |
| 905     | S          | S           | S         | R                             | S            | S            | R                                | S                        | S          |
| 6037    | S          | S           | S         | N.A.                          | R            | R            | R                                | N.A.                     | S          |
| 7183    | S          | S           | S         | R                             | R            | R            | R                                | R                        | S          |
| 3043    | S          | S           | S         | R                             | R            | R            | R                                | R                        | S          |
| 8653    | S          | S           | S         | R                             | R            | R            | R                                | R                        | S          |
| 3062    | S          | S           | S         | R                             | R            | R            | R                                | R                        | S          |
| 9190    | S          | S           | S         | R                             | R            | R            | R                                | R                        | S          |
| 404     | S          | S           | S         | N.A.                          | N.A.         | S            | N.A.                             | S                        | S          |
| 11223   | S          | S           | S         | N.A.                          | S            | I            | R                                | S                        | S          |
| 22424   | S          | S           | S         | R                             | N.A.         | S            | N.A.                             | S                        | S          |
| 26786   | S          | S           | S         | R                             | N.A.         | S            | N.A.                             | S                        | S          |
| 10485   | S          | S           | S         | N.A.                          | N.A.         | N.A.         | I                                | S                        | S          |

|       |   |   |   |      |   |   |      |   |   |
|-------|---|---|---|------|---|---|------|---|---|
| 10021 | S | S | S | N.A. | R | R | R    | R | S |
| 13703 | S | S | S | N.A. | S | I | R    | S | S |
| 7914  | S | S | S | R    | R | R | N.A. | R | S |

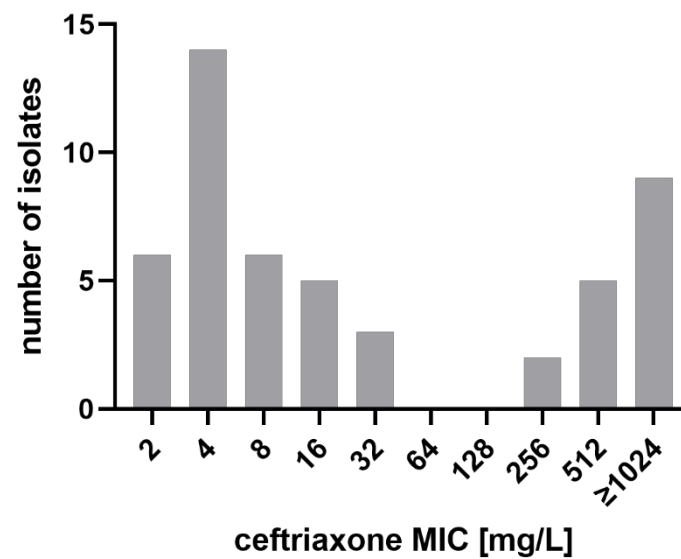

**Figure S1:** Ceftriaxone MIC distribution data for the *E. faecalis* strain collection at the Institute of Infectious Diseases and Infection Control, Jena University Hospital, Germany.
